# Supplementary material for: AOM/DSS Induced Colitis-Associated Colorectal Cancer in 14-Month-Old Female Balb/C and C57/Bl6 Mice—A Pilot Study
Source: MDPI journal article supplement (doi:10.3390/ijms23095278), 2022-05-09

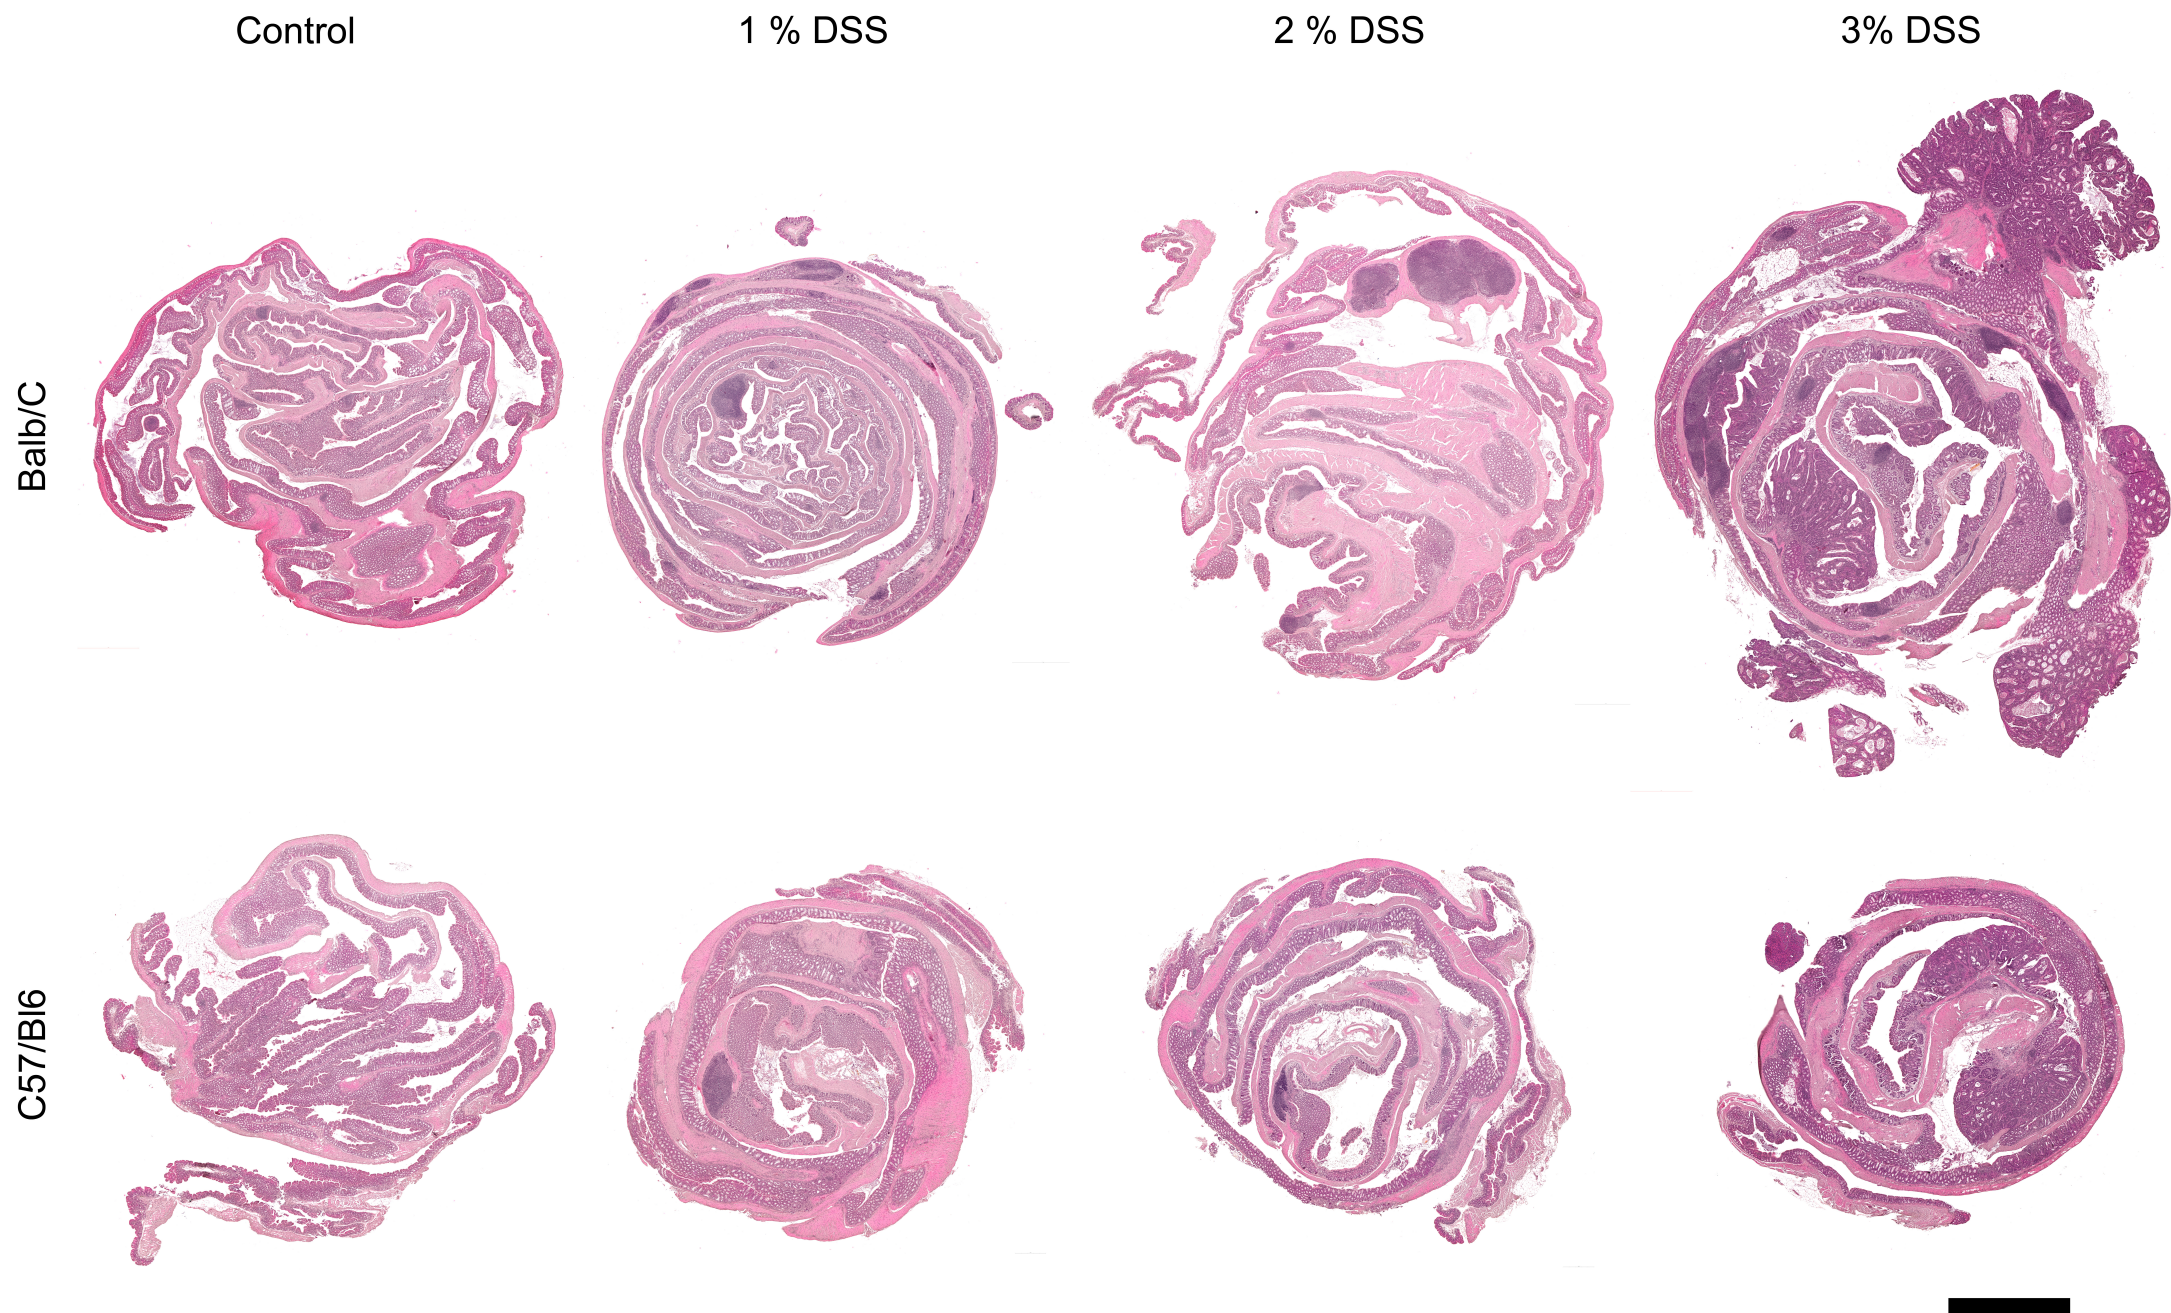

Figure S1: Representative H&E stainings of colon swiss rolls. Scale bar = 2 mm.



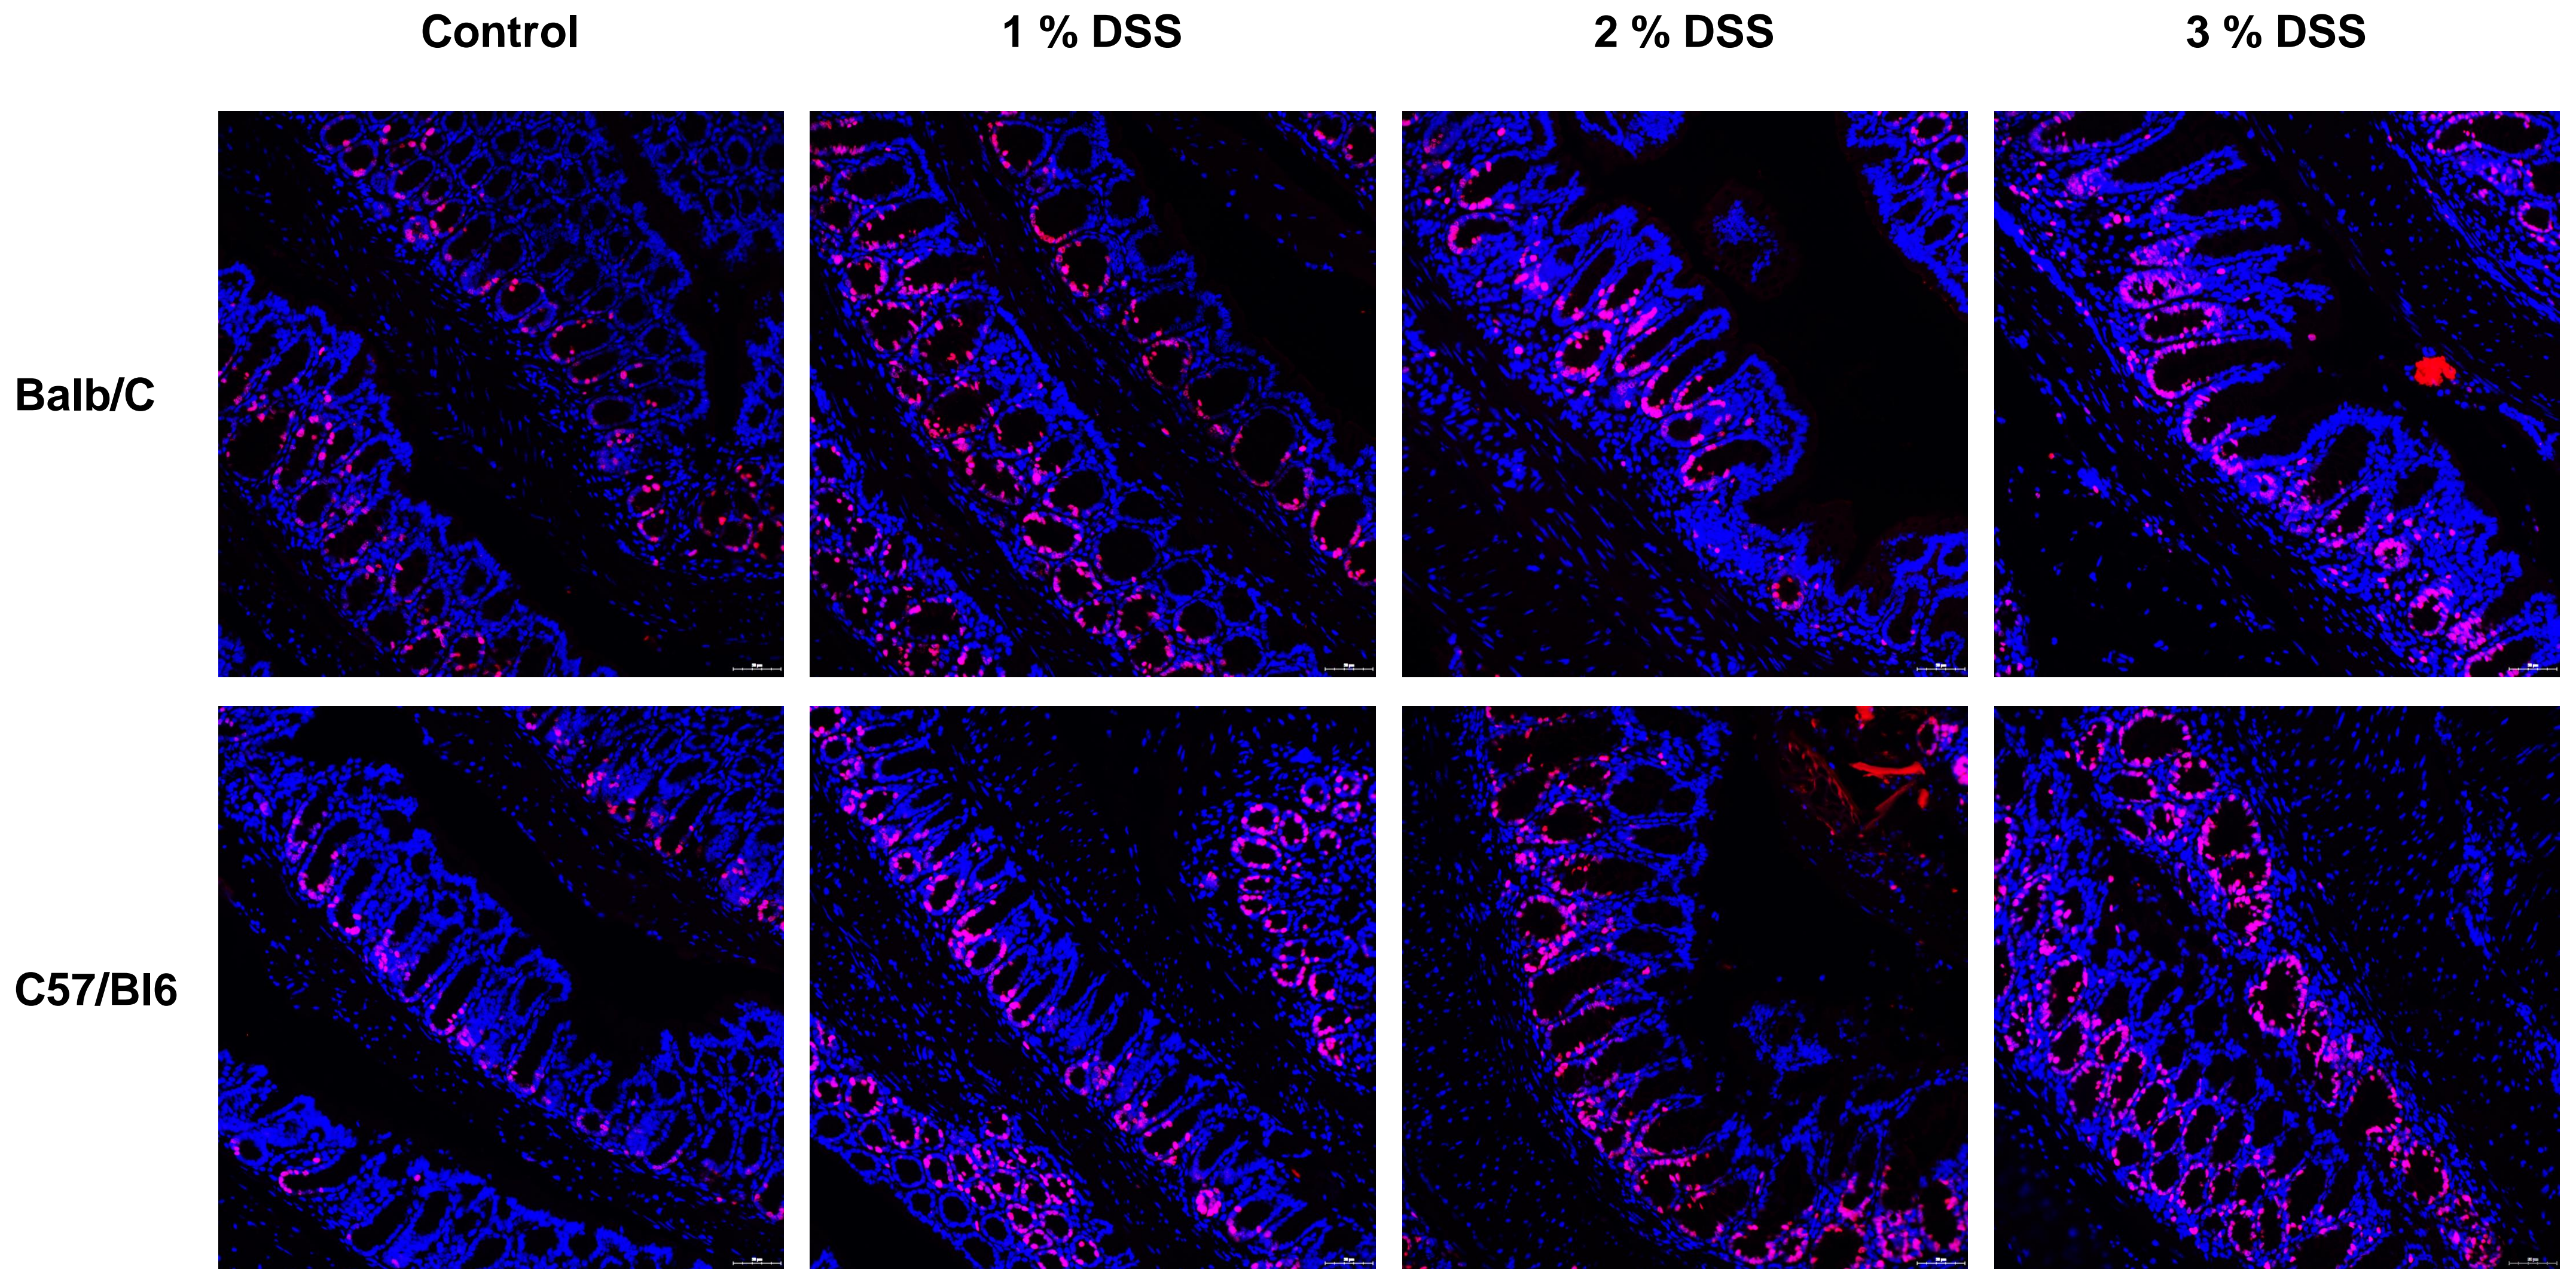

**Figure S2:** Representative immunofluorescence stainings for Ki67 (red), counterstained with DAP (nuclei, blue). Scale bar = 200  $\mu$ m.



**Control**

**1 % DSS**

**2 % DSS**

**3 % DSS**

**Balb/C**

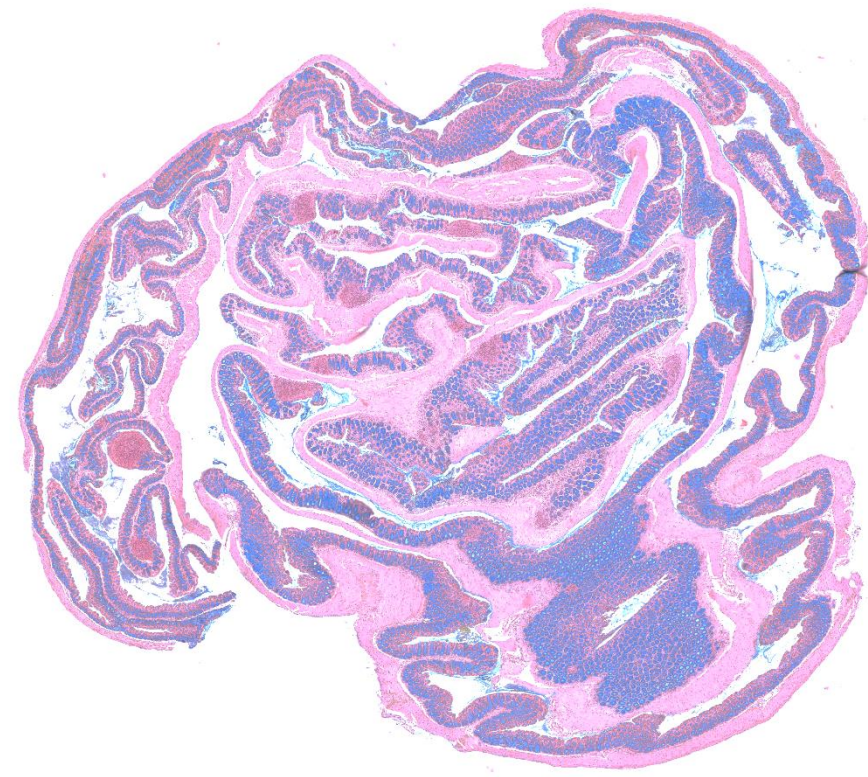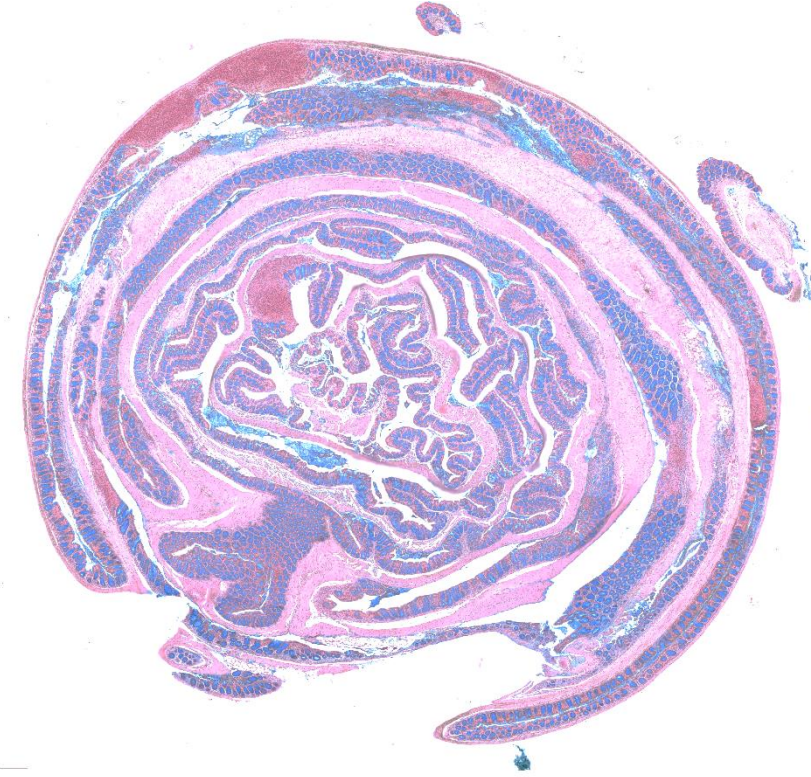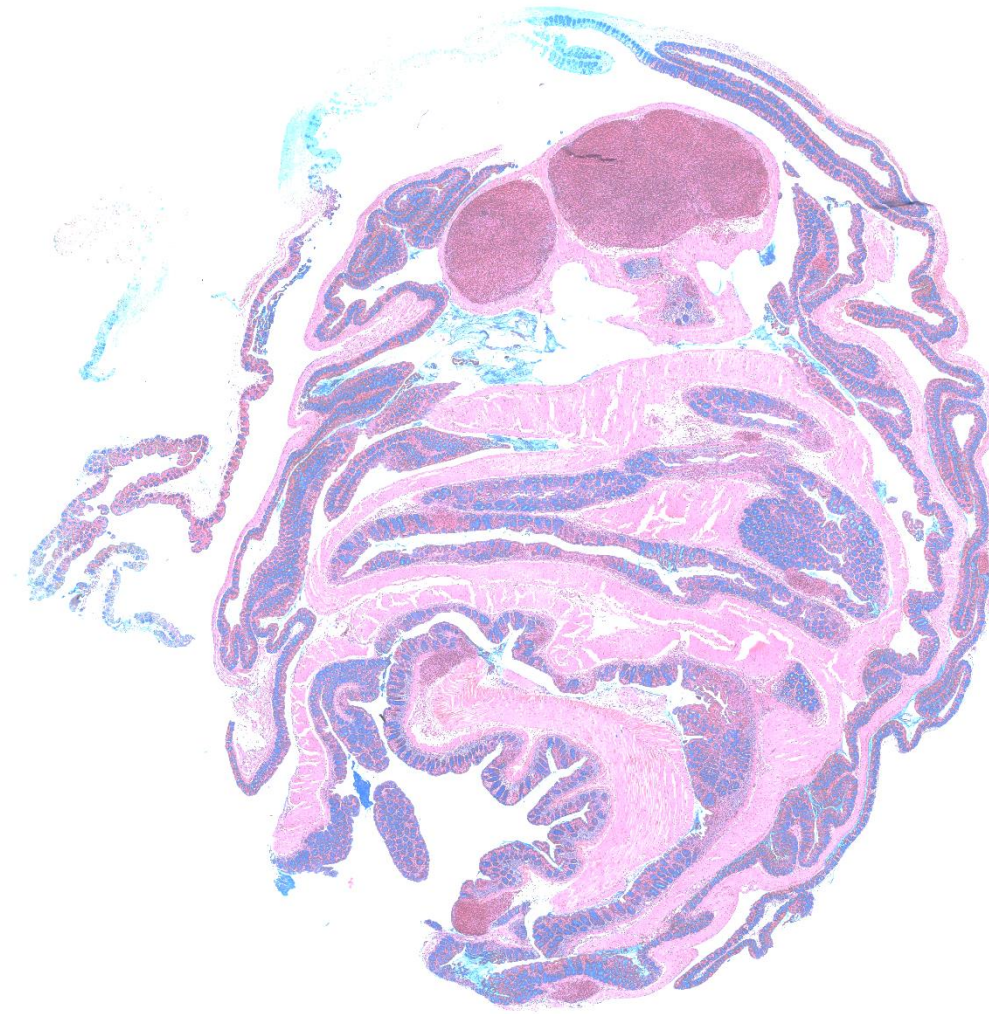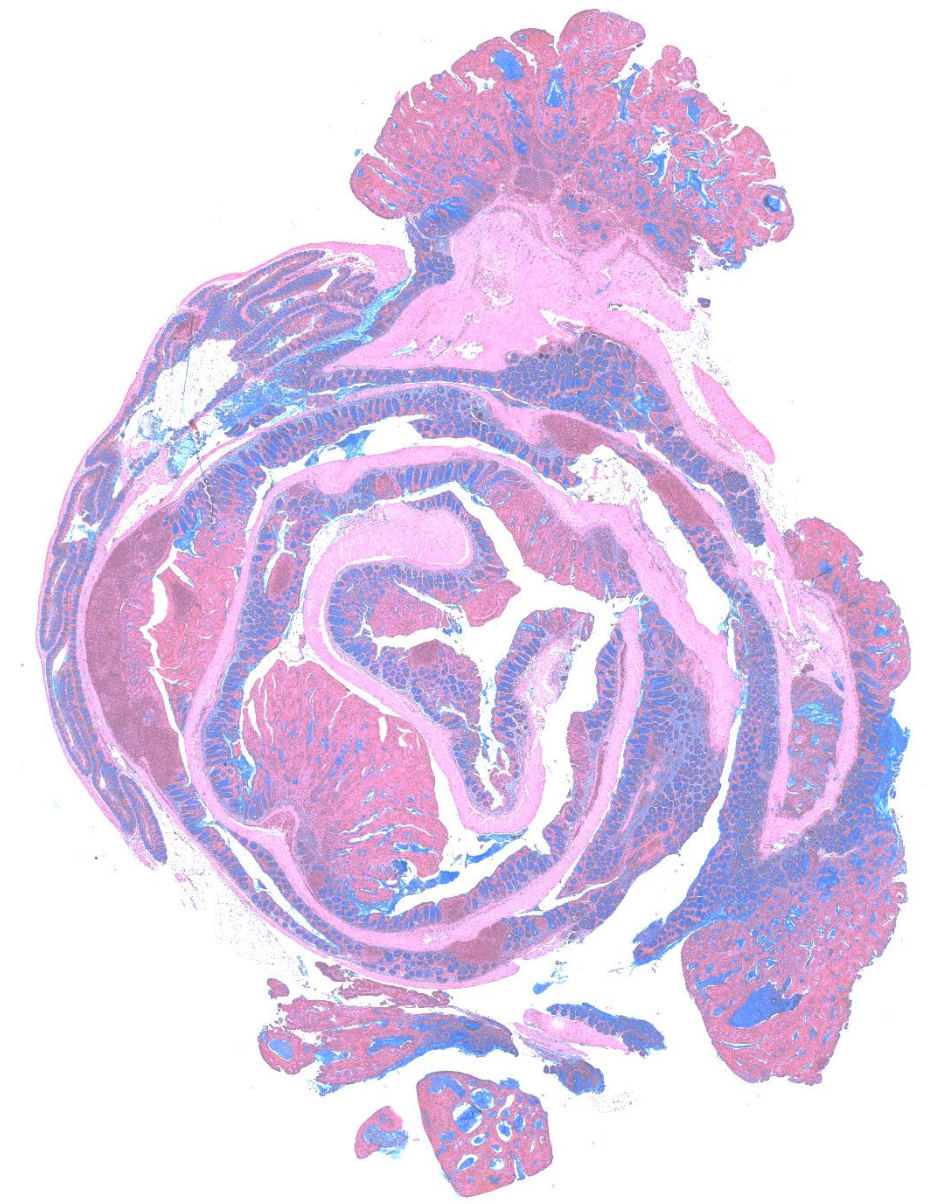

**C57/Bl6**

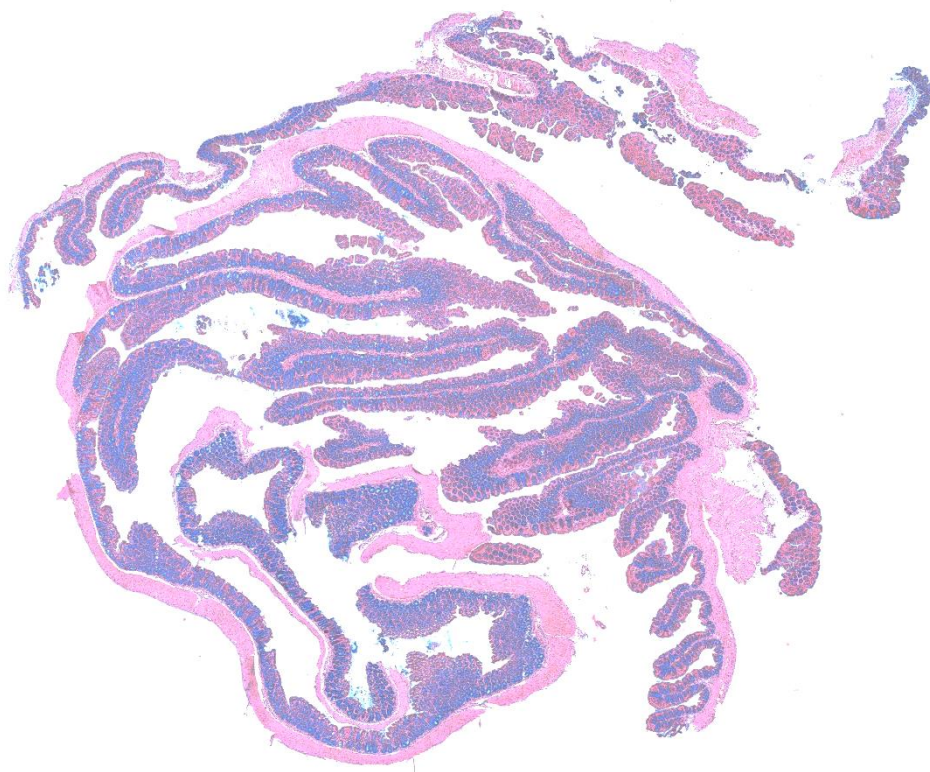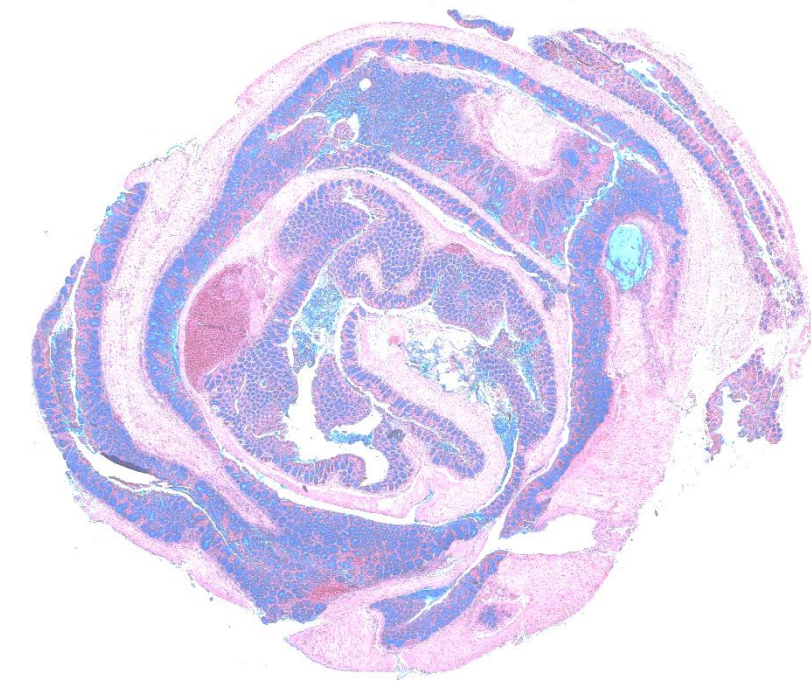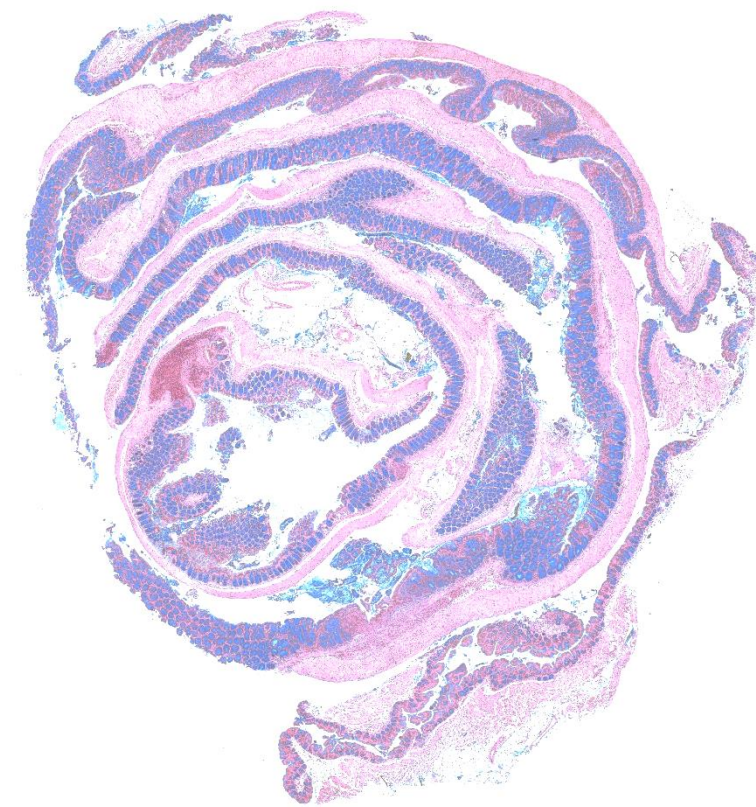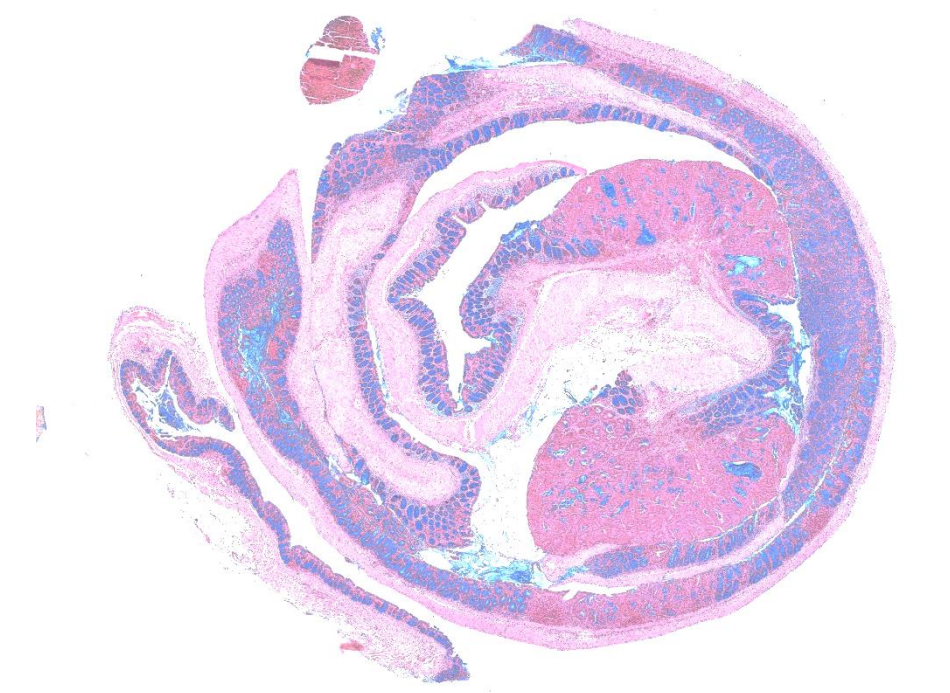

**Figure S3:** Representative mucin stainings (pink = tissue, blue = mucin). Scale bar = 2 mm.

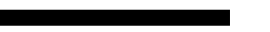

Supplement: s1 [file s1]
